# Supplementary material for: Site-specific protein double labeling by expressed protein ligation: applications to repeat proteins
Source: Royal Society of Chemistry journal article supplement (doi:10.1039/c1ob06397a), 2011-10-06
Supplement: c1ob06397a.pdf [file c1ob06397a.pdf]

## SUPPORTING INFORMATION

### **Site-specific protein double labeling by expressed protein ligation: applications to repeat proteins**

by

Lucia De Rosa, Aitziber L. Cortajarena, Alessandra Romanelli, Lynne Regan and Luca Domenico D'Andrea

List of Content:

Figure S1: Primary sequences of CTPR3 variants.

Figure S2: LC-MS analysis of purified double labeled CTPR3[1\_3].

Figure S3: LC-MS analysis of purified doubly-labeled CTPR3[N\_C].

Figure S4: LC-MS analysis of purified doubly-labeled CTPR3[1\_C].

Figure S5: LC-MS analysis of purified doubly-labeled CTPR3[2\_C].

Figure S6: Circular dichroism spectra of CTPR3 variants.

**CTPR3:**

GNSAEAWYNL GNAYYKQGDY DEAEIYYQKA LELDPNNAEA WYNLGNAYYK QGDYDEAEIY  
YQKALELDPN NAEAWYNLGN AYYKQGDYDE AIEYYQKALE LDPNNAEAKQ NLGNAKQKQG

**CTPR3[1\_3]**

GNSAEAWYNL GNAYYKQGDY DEAEIYYQKA LELDP**C**NAEA WYNLGNAYYK QGDYDEAEIY  
YQKALELDPN NAEAWYNLGN AYYKQGDYDE AIEYYQKALE LDPN**C**AEAKQ NLGNAKQKQG

**CTPR3[1\_C]**

GNSAEAWYNL GNAYYKQGDY DEAEIYYQKA LELDP**C**NAEA WYNLGNAYYK QGDYDEAEIY  
YQKALELDPN NAEAWYNLGN AYYKQGDYDE AIEYYQKALE LDPNNAEAKQ NLGNAKQKQ**GC**

**CTPR3[2\_C]**

GNSAEAWYNL GNAYYKQGDY DEAEIYYQKA LELDPNNAEA WYNLGNAYYK QGDYDEAEIY  
YQKALELDP**C** NAEAWYNLGN AYYKQGDYDE AIEYYQKALE LDPNNAEAKQ NLGNAKQKQ**GC**

**CTPR3[N\_C]**

**GC**GNSAEAWYNL GNAYYKQGDY DEAEIYYQKA LELDPNNAEA WYNLGNAYYK QGDYDEAEIY  
YQKALELDPN NAEAWYNLGN AYYKQGDYDE AIEYYQKALE LDPNNAEAKQ NLGNAKQKQ**GC**

**Figure S1:** Amino acid sequences of the CTPR3 variants. In bold are indicated amino acid mutation/insertion with respect to wtCTPR3.

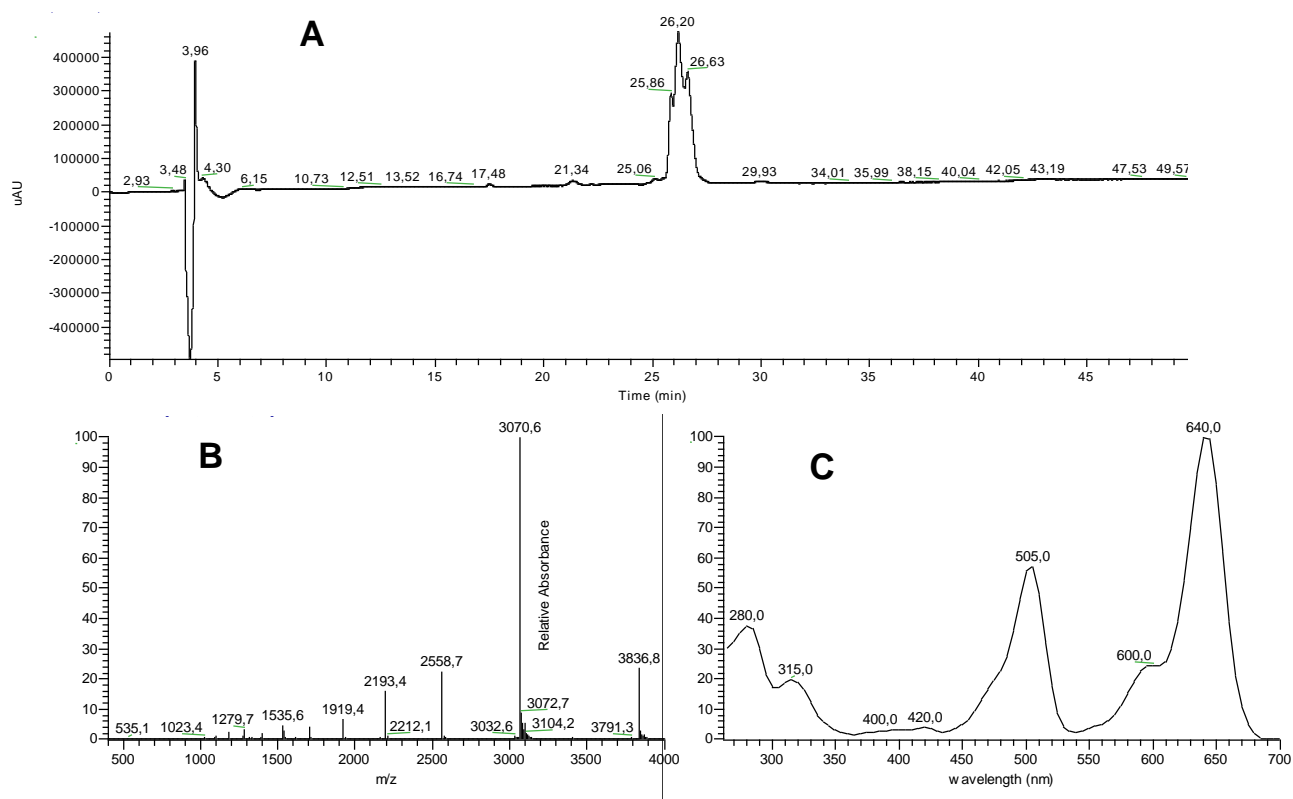

**Figure S2.** LC-MS analysis of purified double labeled CTPR3[1\_3]. A) Chromatographic profile at 210 nm. B) ESI mass spectrum of the chromatographic peaks around 26 min. Experimental molecular mass = 15346.4 Da; calculated molecular mass 15346.8 Da. C) Absorption spectrum of the chromatographic peak around 26 min.

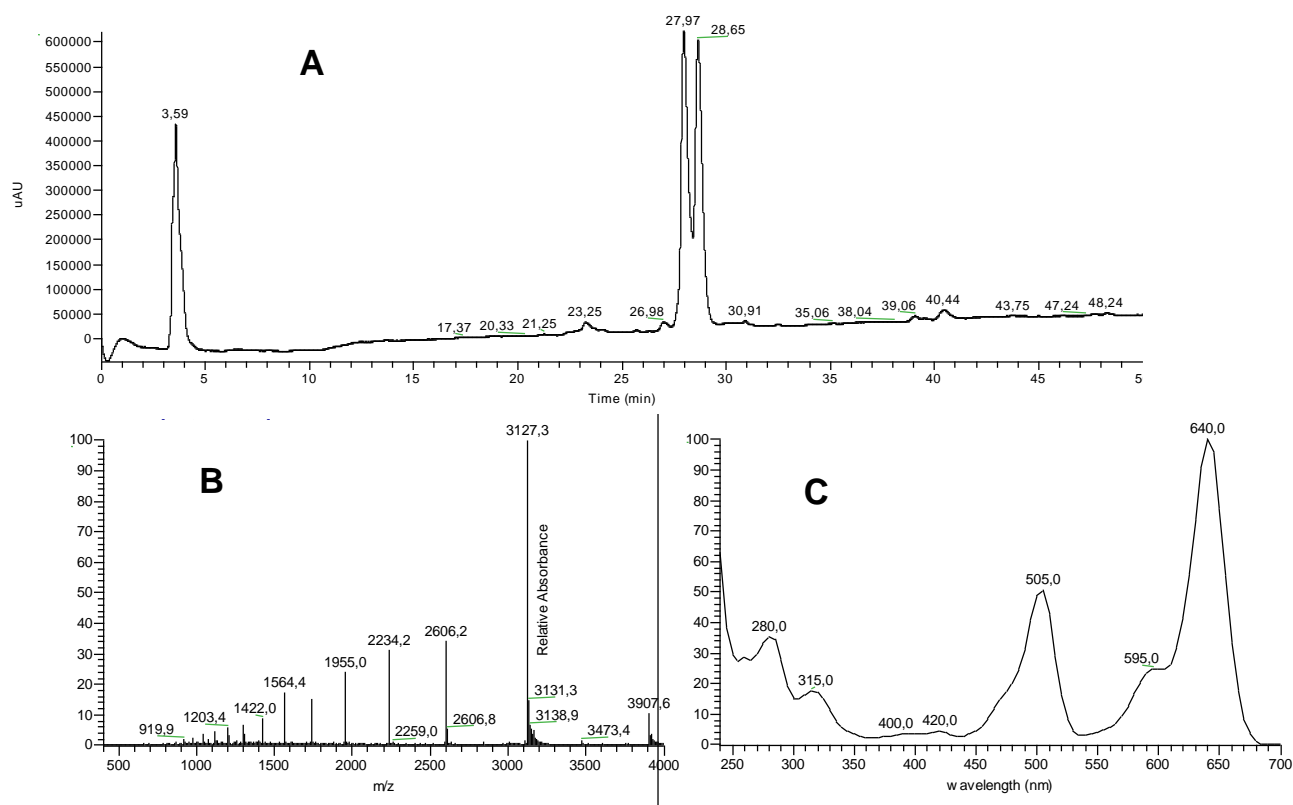

**Figure S3.** LC-MS analysis of purified doubly-labeled CTPR3[N<sub>C</sub>]. A) Chromatographic profile at 210 nm. B) Mass spectrum of the chromatographic peak at 27.97 min. Experimental molecular mass =15631.3 Da; calculated molecular mass =15632.2 Da. Identical mass spectrum is observed for the peak at 28.65 min. C) Absorption spectrum of the chromatographic peak at 27.97 min. Identical spectrum is observed for the peak at 28.65 min.

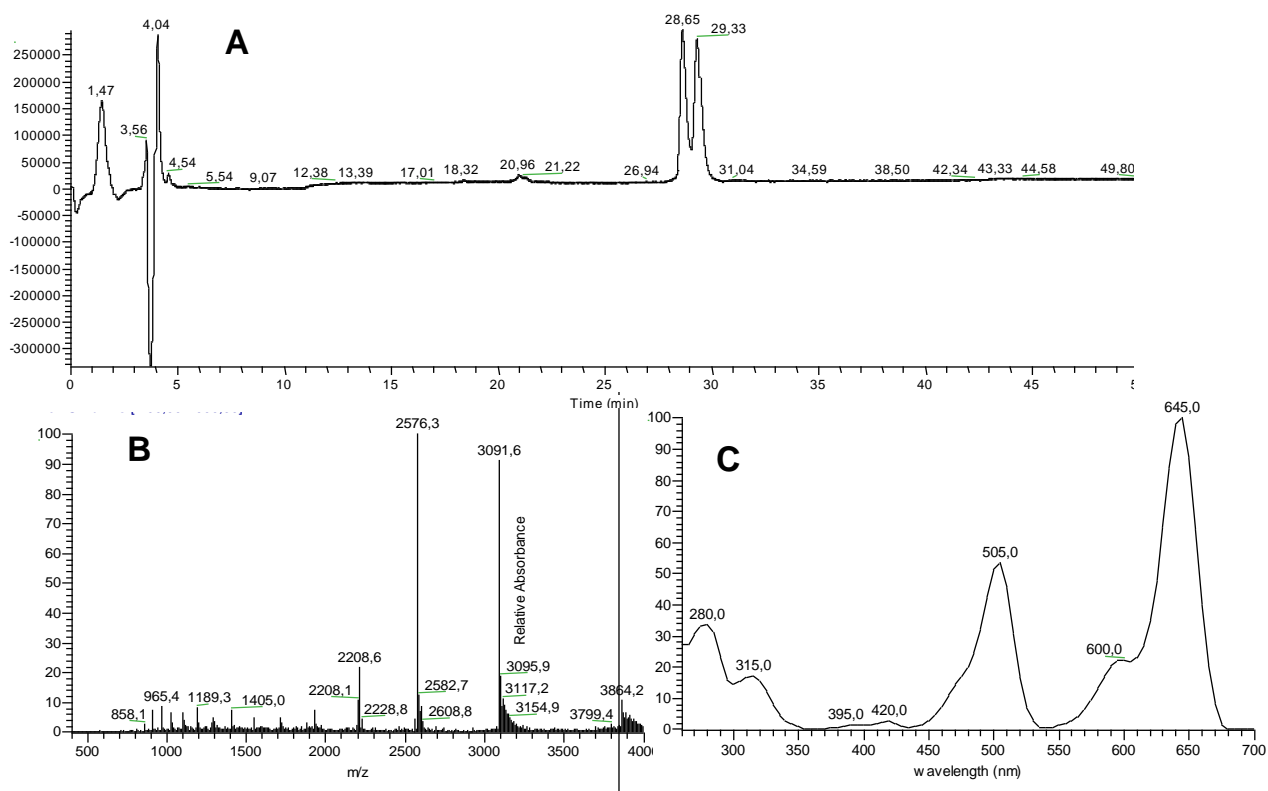

**Figure S4.** LC-MS analysis of purified doubly-labeled CTPR3[1\_C]. A) Chromatographic profile at 210 nm. B) ESI mass spectrum of the chromatographic peak at 28.65 min. Experimental molecular mass =15455.7 Da; calculated molecular mass =15460.9 Da. Identical mass spectrum is observed for the peak at 29.33 min. C) Absorption spectrum of the chromatographic peaks at 28.65 min. Identical spectrum is observed for the peak at 29.33 min.

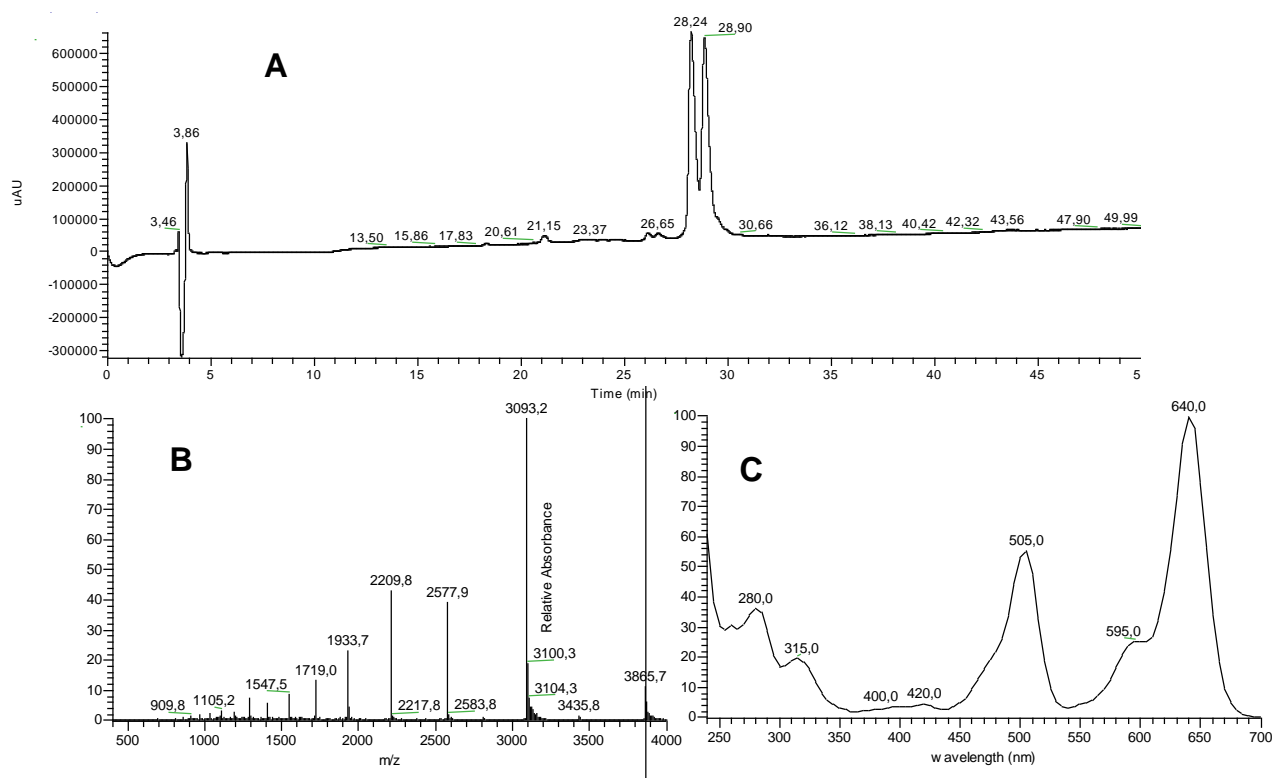

**Figure S5.** LC-MS analysis of purified doubly-labeled CTPR3[2\_C]. A) Chromatographic profile at 210 nm. B) ESI mass spectrum of the chromatographic peak at 28.24 min. Experimental molecular mass = 15461.6 Da; calculated molecular mass = 15460.9 Da. Identical mass spectrum is observed for the peak at 28.90 min. C) Absorption spectrum of the chromatographic peak at 28.24 min. Identical spectrum is observed for the peak at 28.90 min.

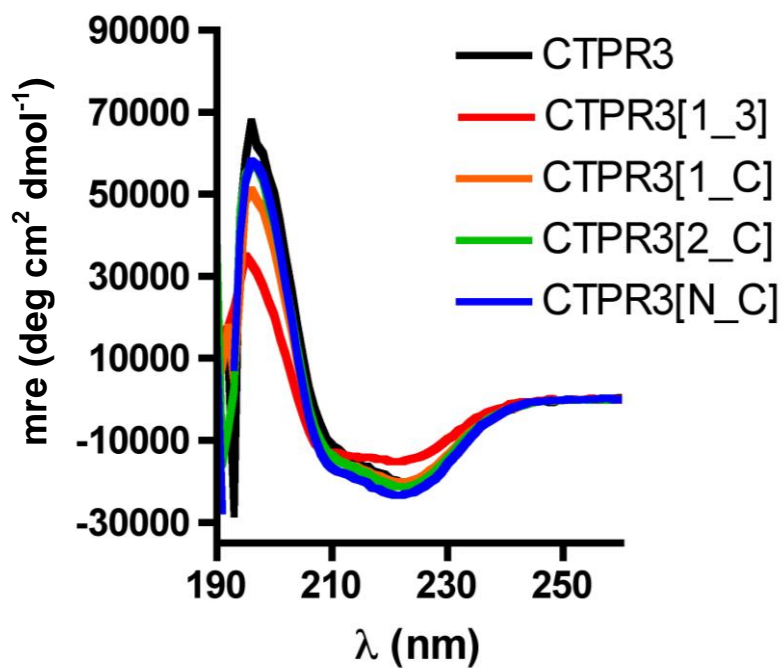

**Figure S6.** Circular dichroism spectra of CTPR3 variants. Far-uv CD spectrum of CTPR3 (black), and CTPR3 variants CTPR3[1\_3] (red), CTPR3[1\_C] (orange), CTPR3[2\_C] (green), CTPR3[N\_C] (blue), doubly labeled with ATTO488 and ATTO 647N dyes. The spectra were acquired at 6  $\mu$ M protein concentration in 150 mM NaCl, phosphate 50 mM pH 6.5 buffer at 25 °C. Spectra are reported as mean residue ellipticity (mre) deg cm<sup>2</sup> dmol<sup>-1</sup>
